# Supplementary material for: Relevance of the Updated Recursive Partitioning Analysis (U-RPA) Classification in the Contemporary Care of Patients with Brain Metastases
Source: MDPI journal article supplement (doi:10.3390/cancers15123255), 2023-06-20
Supplement: s1 [file s1]

**Table S1.** Median survival of patients according to treatment and U-RPA.

| Class | U-RPA        |              |               |             |                   |
|-------|--------------|--------------|---------------|-------------|-------------------|
|       | BDT<br>N=752 | SRS<br>N=371 | WBRT<br>N=305 | SMT<br>N=76 | Surgery*<br>N=120 |
| 1     | 28.1         | 29.1         | 22.4          | Undefined   | 25.4              |
| 2A    | 14.7         | 16           | 9.6           | 30.9        | 21.6              |
| 2B    | 7.6          | 10.9         | 4.9           | 6.2         | 8.4               |
| 3     | 3.3          | 4            | 2.9           | 3.1         | 5.7               |

U-RPA: Updated-RPA; BDT: brain-directed therapy SRS: stereotactic radiosurgery; WBRT: whole-brain radiation therapy; SMT: systemic medical therapy\* Surgery followed by SRS, WBRT or SMT.

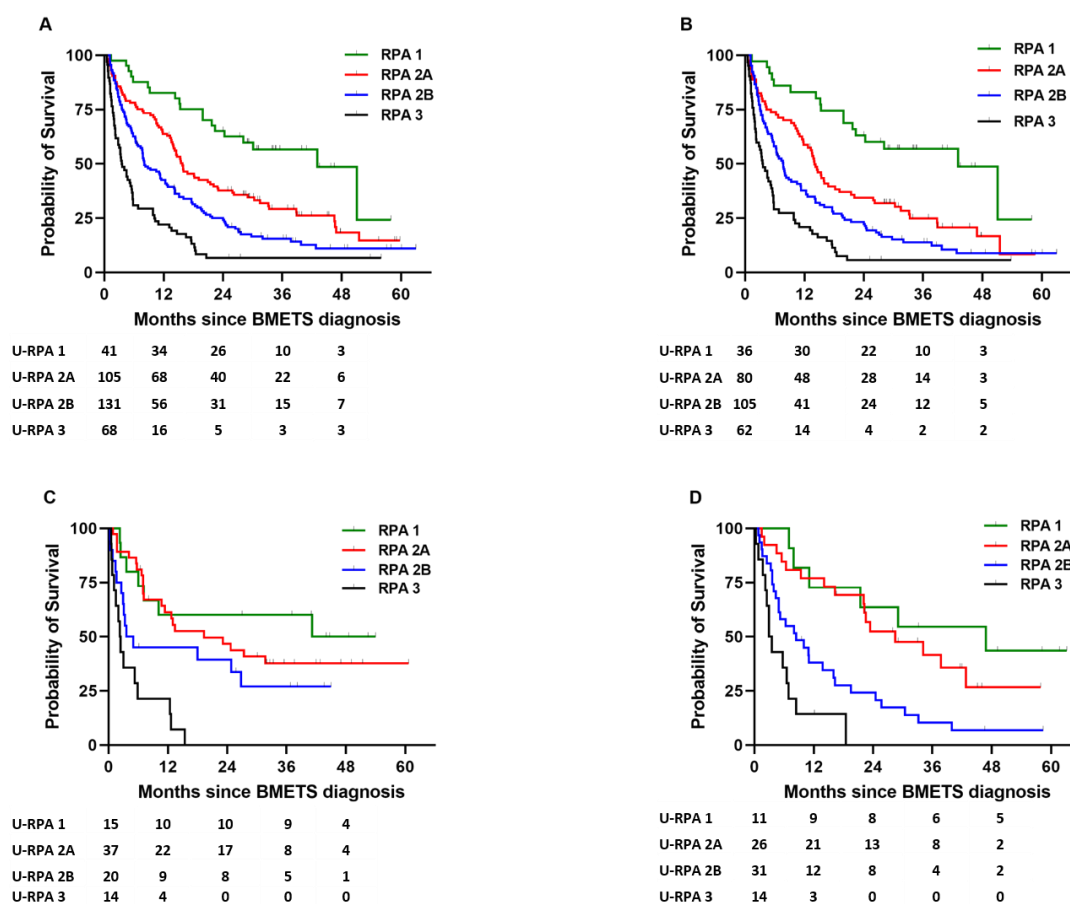

**Figure S1.** Kaplan-Meier survival curves by primary cancer A) NSCLC, B) NSCLC without genomic alterations, C) melanoma, and D) breast cancer.

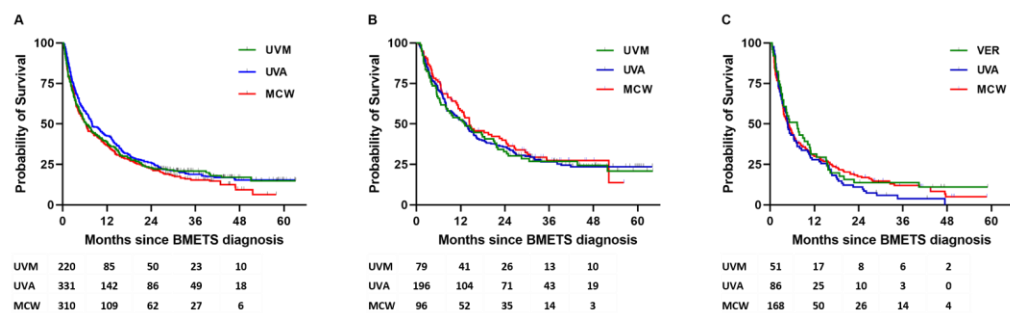

**Figure S2.** Kaplan Meier survival curves by academic center A) all patients receiving BDT B) patients receiving WBRT and C) patients receiving SRS.
